# Supplementary material
Source: PubMed Central journal article supplement (PMC4914615)
Supplement: AAC.03085-15_zac007165311so1.pdf [file AAC.03085-15_zac007165311so1.pdf]

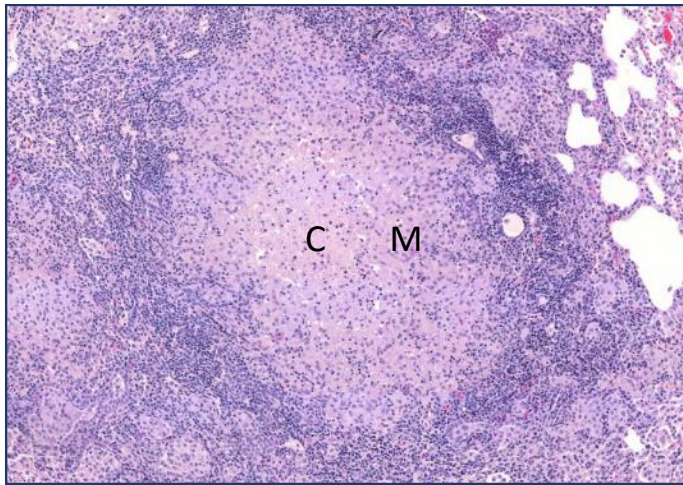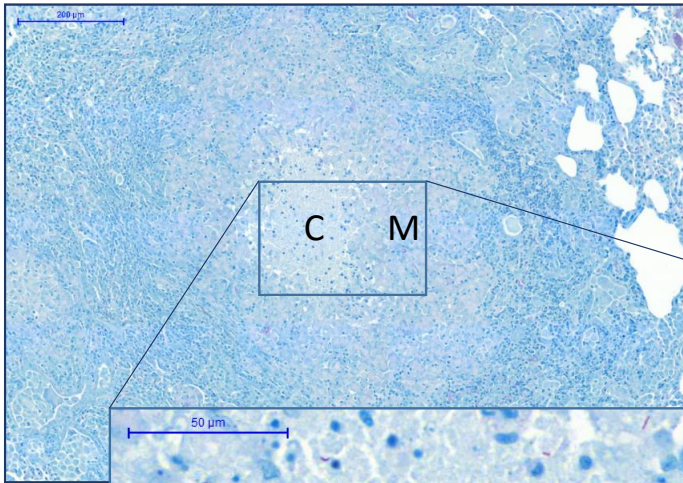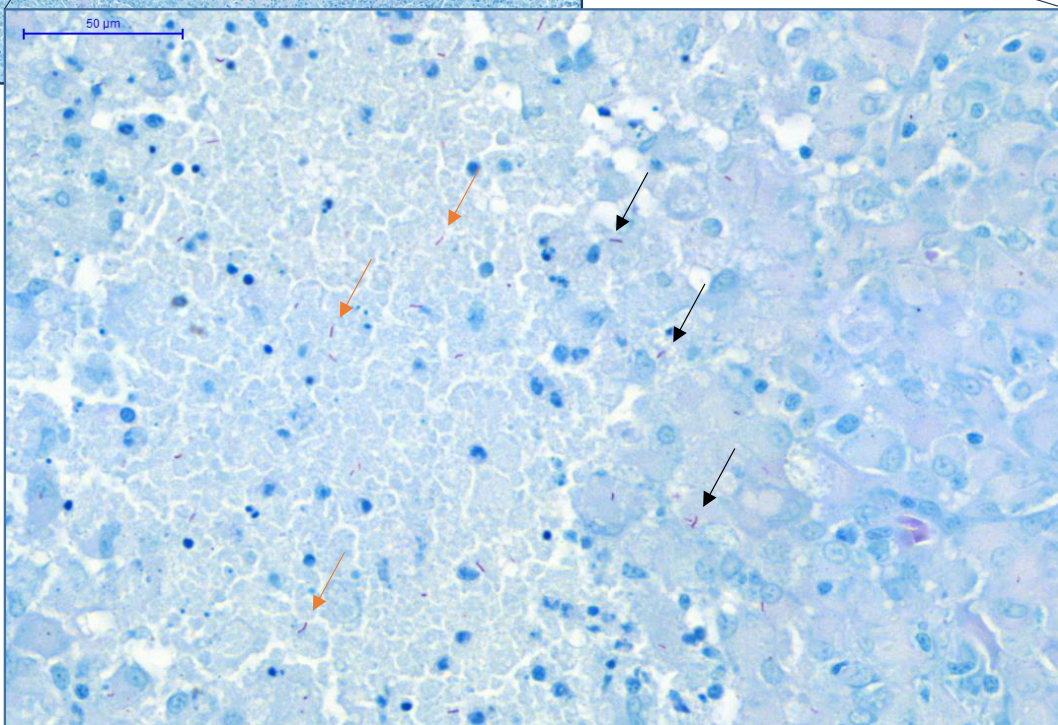

636 **Figure S1.** Hematoxylin and eosin (H&E) stain (upper panel) and acid-fast stain (lower panel) of a  
637 typical rabbit necrotic granuloma at 10 weeks post-infection, prior to treatment initiation, at  
638 10x magnification. The inset shows a 40x magnification of the central core with intracellular  
639 (black arrows) and extracellular (orange arrows) bacilli seen in the macrophage rim (M) and  
640 caseating core (C), respectively. Note that the extracellular bacilli may be encased in dead cell  
641 remnants. Scale bar: 200 $\mu$ m in the low resolution image and 50 $\mu$ m in the high resolution inset.  
642
